# Supplementary material
Source: HighWire-hosted journal article supplement (https://jitc.bmj.com/content/7/1/284)

## 1 SUPPLEMENTAL DATA

### 2 SUPPLEMENTAL MATERIAL AND METHODS

#### 3 Culture of cell lines and primary CD8 T lymphocytes

4 HLA-A2<sup>neg</sup>/TCR $\alpha$  $\beta$ <sup>ko</sup>/CD8 $\alpha$  $\beta$ <sup>pos</sup> Jurkat J76 T cells (defined thereafter as HLA-A2<sup>neg</sup> J76 CD8 $\alpha$  $\beta$   
5 cells) were generated following transduction of CD8 $\alpha$ - and CD8 $\beta$ -encoding plasmids into the  
6 TCR  $\alpha$  and  $\beta$  knock-out HLA-A2<sup>neg</sup> J76 T cell subline using retroviral vectors (kindly provided  
7 by Drs. I. Edes and W. Uckert; Max-Delbrück-Center, Berlin, Germany, *unpublished data*).  
8 HLA-A2<sup>neg</sup>/J76 CD8 $\alpha$  $\beta$  cells, HLA-A2<sup>pos</sup>/TAP-deficient T2 cells (ATCC CRL-1992), HLA-  
9 A2<sup>pos</sup>/NY-ESO-1<sup>neg</sup> NA8 cells (CVCL-S599) and HLA-A2<sup>pos</sup>/NY-ESO-1<sup>pos</sup> Me275 cells  
10 (CVCL\_S597) were cultured at 37°C and 5% CO<sub>2</sub> in RPMI 1640 medium supplemented with  
11 10% fetal calf serum (FCS), 100 U/mL penicillin and 100  $\mu$ g/mL streptomycin (Gibco).  
12 Primary CD8 T lymphocytes were positively enriched from peripheral blood mononuclear cells  
13 (PBMC) obtained from healthy donors using anti-CD8-coated magnetic microbeads (Miltenyi  
14 Biotec) and cultured at 37°C and 5% CO<sub>2</sub> in RPMI supplemented with 8% human serum, 100  
15 U/mL penicillin, 100  $\mu$ g/mL streptomycin, 2 mM L-glutamine, 0.1 mg/mL kanamycin, 1 mM  
16 sodium pyruvate, 1X non-essential amino acids, 50  $\mu$ M  $\beta$ -mercaptoethanol (Gibco) and 150  
17 U/mL recombinant human IL-2 (gift from GlaxoSmithKline). HLA-A\*0201 (A2 thereafter)  
18 status of the cells was determined by flow cytometry performed on PBMCs before CD8  
19 isolation. A2<sup>pos</sup> and A2<sup>neg</sup> CD8 T lymphocytes were stimulated with CD3/CD28 beads  
20 (ThermoFisher) at a ratio of 1:1 for transduction and expansion, and subsequently expanded  
21 every 14-21 days by re-stimulation with 1  $\mu$ M phytohemagglutinin (PHA; Oxoid) and 30 Gy-  
22 irradiated allogeneic A2<sup>neg</sup> PBMCs as feeders.

#### 23 Generation of CRISPR-A2 primary CD8 T cells and CRISPR-A2 NA8 tumor cells

24 The kinetic experiments (see Fig. 2, main manuscript) were performed on primary CD8 T cells  
25 from A2<sup>pos</sup> or A2<sup>neg</sup> healthy donors, for which donor-specific variations could be observed in  
26 the *ex vivo* expression of surface receptors (data not shown). Therefore, using the CRISPR/Cas9  
27 technology, we generated A2<sup>pos</sup> (i.e. CRISPR/mock) and A2<sup>neg</sup> (i.e. CRISPR/A2) primary CD8  
28 T cells sharing the same cellular background. CRISPR-A2 primary CD8 T cells and NA8 cells  
29 were produced according to the protocol by Ran et al. (1). Briefly, the 20 nucleotide-single  
30 guide (sgRNA) sequence targeting HLA-A\*0201 was designed using <http://CRISPR.mit.edu>  
31 website and selected for high quality score (>80) to minimize off-targets. The sequence of the  
32 sgRNA is as following: GAGGGTCCGGAGTATTGGGA. An extra 5' G nucleotide was added

33 to the sgRNA sequence to improve U6 promoter efficiency. The oligo pairs encoding the  
34 sgRNA were annealed and ligated into a BsmBI-digested lenti-CRISPR plasmid v2 bearing  
35 Cas9 and sgRNA scaffold (Addgen plasmid #52961) to generate lenti-CRISPR-A2 plasmid.  
36 This plasmid was transfected into HEK 293T/17 cells (ATCC CRL-11268) using a standard  
37 calcium phosphate protocol for the production of lentiviral particles. The supernatant was  
38 concentrated by ultracentrifugation at 24000 g for 2h and subsequently used to infect freshly  
39 isolated A2<sup>pos</sup> CD8 T lymphocytes after 24h stimulation with CD3/CD28 beads (1<sup>st</sup> expansion)  
40 or NA8 cells to generate CRISPR-A2 (A2<sup>neg</sup>)-CD8 T cells or CRISPR-A2 (A2<sup>neg</sup>)-NA8 cells,  
41 respectively. Lenti-CRISPR-EGFP sgRNA 6 (Addgen plasmid #51765) was used as a mock  
42 control. Transduced cells (A2<sup>neg</sup>) were sorted to purity with PE-labeled HLA-A2 antibody by  
43 flow cytometry (FACSARIAII, BD Biosciences).

#### 44 **Generation of TCR-engineered primary CD8 T cells and J76 CD8 $\alpha\beta$ T cells**

45 The full-length codon-optimized TCR AV23.1 and TCR BV13.1 chain sequences of a dominant  
46 NY-ESO-1<sub>157-165</sub>-specific T cell clone of patient LAU155 (BC1) were cloned in the pRRL  
47 lentiviral vectors, as IRES or T2A constructs. Structure-based amino acid substitutions within  
48 CDR2 $\alpha\beta$  and/or CDR3 $\alpha\beta$  loops were introduced into the wild-type (WT) TCR sequence using  
49 the QuickChange mutagenesis kit (Stratagene) and all mutations were confirmed by DNA  
50 sequencing (2, 3). Concentrated supernatant of lentiviral-transfected 293T cells was used to  
51 infect (i) A2<sup>pos</sup> and A2<sup>neg</sup> primary CD8 T cells (1<sup>st</sup> expansion), (ii) CRISPR-A2 and CRISPR-  
52 EGFP primary CD8 T cells (2<sup>nd</sup> expansion) or (iii) A2<sup>pos</sup> and A2<sup>neg</sup> J76 CD8 $\alpha\beta$  T cells. Primary  
53 CD8 T cells were infected overnight in plate coated with 10  $\mu\text{g}/\text{cm}^2$  retronectin (Takara), while  
54 J76 CD8 $\alpha\beta$  cells were infected for 30 min at 37°C. The transduction efficiency was 5-30% for  
55 freshly isolated CD8 T cells, 1% for 2<sup>nd</sup> round of stimulated CRISPR-CD8 T cells, and over  
56 96% for J76 CD8 $\alpha\beta$  cells. Integrated TCR lentiviral copy number was quantified by qPCR and  
57 was similar across TCR variants (1-2 copies/genome in primary sorted CD8 T cells and 9-26  
58 copies/genome in J76 CD8 $\alpha\beta$  T cells) (data not shown; Supp. Table 1).

#### 59 **Granzyme B and perforin staining by flow cytometry**

60 For intracellular staining, 3x10<sup>5</sup> TCR-transduced A2<sup>pos</sup> and A2<sup>neg</sup> primary CD8 T cells from  
61 healthy individuals were fixed in PBS 1% formaldehyde, 2% glucose, and 5 mM NaN<sub>3</sub> for 20  
62 min at room temperature, before being stained with corresponding antibodies (granzyme B and  
63 perforin) in PBS 0.2% BSA, 5 mM EDTA, 0.2% NaN<sub>3</sub>, and 0.1% saponin. All experiments  
64 were performed under unstimulated, resting culture conditions. Samples were acquired with a

65 Gallios (Beckman Coulter) flow cytometer and data were analyzed by FlowJo software (Tree  
66 star, v10.0.8).

#### 67 **CD107a degranulation assay**

68 A2<sup>pos</sup>/TAP-deficient T2 cells were pulsed with 0.1  $\mu$ M native NY-ESO-1<sub>157-165</sub> peptide for 1h  
69 at 37°C, washed and incubated with TCR-transduced A2<sup>pos</sup> or A2<sup>neg</sup> primary CD8 T cells at an  
70 effector-to-target (E:T) of 2:1 for 4h in the presence of anti-CD107a/LAMP1 and 10  $\mu$ g/mL  
71 brefeldin A. Samples were acquired with a Gallios (Beckman Coulter) flow cytometer and data  
72 were analyzed by Flowjo software (Tree star).

#### 73 **Chromium release assay**

74 The antigen recognition capacity and *in vitro* lytic activity of primary A2<sup>pos</sup> and A2<sup>neg</sup> CD8 T  
75 lymphocytes engineered with TCRs of incremental affinities were assessed using chromium  
76 release assay as previously described (4). Briefly, HLA-A2<sup>pos</sup>/TAP-deficient T2 cells or HLA-  
77 A2<sup>pos</sup>/NY-ESO-1<sup>pos</sup> Me275 cells were labeled with <sup>51</sup>Cr. In peptide titration assay, T2 cells were  
78 pulsed with serial dilution of native NY-ESO-1<sub>157-165</sub> peptide and incubated for 4 h with A2<sup>pos</sup>  
79 or A2<sup>neg</sup> CD8 effector T cells at E:T ratio of 10:1. In tumor killing assay, Me275 cells were  
80 pulsed or not with 1  $\mu$ M of NY-ESO-1<sub>157-165</sub> native peptide and incubated for 4 h with A2<sup>pos</sup> or  
81 A2<sup>neg</sup> CD8 effector T cells at indicated E:T ratios. Percentage of specific lysis was calculated  
82 as 100x (experimental-spontaneous release)/(total-spontaneous release). Dose-response curve  
83 analysis and EC50 values were obtained using Prism software (GraphPad, v.7.03).

#### 84 **Functional PD1 blockade with nivolumab**

85 One day prior to TCR transduction, primary A2<sup>pos</sup> (directly isolated from a healthy donor) or  
86 A2<sup>pos</sup> (isolated following CRISPR/GFP transduction) CD8 T cells were cultured without  
87 (control) or with 20  $\mu$ g/mL PD-1 blocking antibody (nivolumab; a gift from the Department of  
88 Oncology, University Hospital Lausanne). The culture medium containing 20  $\mu$ g/mL  
89 nivolumab was constantly renewed every 3-4 days.

90

**Supplemental Table 1. Characteristics of affinity-increased HLA-A2/INY-ESO-1-specific TCRs**

| TCR name                      | NY-ESO-1-specific TCR (AV23.1/BV13.1) <sup>a)</sup> |                 |                 |               | TCR-pMHC affinity&kinetics              |                                    | quantification of TCR LV copy numbers # <sup>e)</sup> |                       |                               |                       |
|-------------------------------|-----------------------------------------------------|-----------------|-----------------|---------------|-----------------------------------------|------------------------------------|-------------------------------------------------------|-----------------------|-------------------------------|-----------------------|
|                               | CDR2 $\alpha$                                       | CDR3 $\alpha$   | CDR2 $\beta$    | CDR3 $\beta$  | K <sub>D</sub> ( $\mu$ M) <sup>a)</sup> | t <sub>1/2</sub> (s) <sup>d)</sup> | HLA-A2 <sup>pos</sup>                                 | HLA-A2 <sup>neg</sup> | primary HLA-A2 <sup>pos</sup> | HLA-A2 <sup>neg</sup> |
| V49I                          | 505152535455                                        | 939495969798    | 495051525354    | 9596979899100 | n.a.                                    | 10.7                               | 19                                                    | 26                    | 2.3                           | 2.2                   |
| WT <sup>b)</sup>              | IQSSQR                                              | RPQTGG          | <b>I</b> GAGIT  | VGAAGE        | 21.4                                    | 53.0                               | 39                                                    | 18                    | 1.4                           | 1.9                   |
| A97L                          | IQSSQR                                              | RPQTGG          | VGAGIT          | VGAAGE        | 2.69                                    | 102.2                              | n.d.                                                  | n.d.                  | n.d.                          | n.d.                  |
| DM $\beta$                    | IQSSQR                                              | RPQTGG          | V <b>A</b> EGIT | VGAAGE        | 1.91                                    | 219.7                              | 20                                                    | 20                    | 1.8                           | 1.1                   |
| TM $\beta$                    | IQSSQR                                              | RPQTGG          | V <b>A</b> EGIT | VGLAGE        | 0.91                                    | 453.1                              | 18                                                    | 9                     | 1.2                           | 1.9                   |
| QM $\alpha$                   | IQ <b>W</b> QR                                      | RPQTGG          | V <b>A</b> EGIT | VGLAGE        | 0.14                                    | 479.7                              | 16                                                    | 12                    | 1.4                           | 1.3                   |
| wtc51m <sup>c)</sup>          | IQSSQR                                              | RPQTGG          | V <b>A</b> IQT  | VGAAGE        | 0.015                                   | 3043.0                             | 20                                                    | 14                    | 1.0                           | 1.2                   |
| $\alpha$ 95:LYm <sup>c)</sup> | IQSSQR                                              | R <b>P</b> LYGG | VGAGIT          | VGAAGE        | n.a.                                    | 172.4                              | n.d.                                                  | n.d.                  | n.d.                          | n.d.                  |
| $\alpha$ 95:LYm/A97L          | IQSSQR                                              | R <b>P</b> LYGG | VGAGIT          | VGLAGE        | n.a.                                    | 260.2                              | n.d.                                                  | n.d.                  | n.d.                          | n.d.                  |

<sup>a)</sup> Point-mutations (in red) and molecular affinity values (by SPR) of affinity-increased TCR variants as described in (3).

<sup>b)</sup> The wild-type BC1 TCR was isolated from melanoma patient LAU155 (5) and differs from the 1G4 TCR (6) by only 4 aa residues (underlined).

<sup>c)</sup> NY-ESO-1-specific variants containing the wtc51 (7) or  $\alpha$ 95:LY (8) mutations within the BC1 TCR background.

<sup>d)</sup> Monomeric TCR-pMHC off-rates (t<sub>1/2</sub>) measured by the cell surface dissociation assay at 4°C using two-color reversible NTAmers (9).

<sup>e)</sup> Lentiviral genomic copy number quantified by qPCR of *gag* and normalized to *albumin*.

<sup>f)</sup> Generation of TCR-transduced HLA-A2<sup>pos</sup> or HLA-A2<sup>neg</sup> CD8 $\alpha\beta$  J76 and primary CD8 T cells as described in the Material & Methods section.

92 **Supplemental Table 2. List of antibodies used in the study**

| Targets                               | Color           | Manufacturer    | Reference  |
|---------------------------------------|-----------------|-----------------|------------|
| panTCR $\alpha\beta$                  | PC5             | Beckman Coulter | A39500     |
| panTCR $\alpha\beta$                  | PE              | Beckman Coulter | B49177     |
| Vbeta13.1                             | PE              | Beckman Coulter | IM2292     |
| CD3 $\epsilon$                        | PC5.5           | BioLegend       | 300430     |
| CD3 $\epsilon$                        | BrV421          | BioLegend       | 300434     |
| PD-1                                  | APC             | BioLegend       | 329908     |
| PD-1                                  | BrV421          | BioLegend       | 329920     |
| TIM-3                                 | PC7             | eBioscience     | 25-3109-42 |
| TIGIT                                 | APC             | eBioscience     | 17-9500-42 |
| 2B4                                   | PC5.5           | BioLegend       | 329514     |
| CD69                                  | FITC            | BD Biosciences  | 347823     |
| CD25                                  | BrV421          | BioLegend       | 302629     |
| 4-1BB                                 | PC7             | BioLegend       | 309818     |
| CD28                                  | BrV421          | BioLegend       | 302930     |
| CD8 $\beta$                           | PE              | Beckman Coulter | IM2217U    |
| CD8 $\beta$                           | FITC            | Beckman Coulter | B42025     |
| CD5                                   | BV421           | BioLegend       | 300626     |
| CD107a                                | FITC            | BD Bioscience   | 555800     |
| Annexin V                             | Cy5             | BD Bioscience   | 559933     |
| Ki67                                  | FITC            | BD Bioscience   | 556026     |
| Granzyme B – intracellular            | FITC            | BioLegend       | 515403     |
| Perforin – intracellular              | APC             | BioLegend       | 308112     |
| c-CBL – intracellular                 | --              | Abcam           | Ab32027    |
| Secondary anti-Rabbit IgG (for c-CBL) | FITC            | BD Biosciences  | 554020     |
| pCD3 $\zeta$ (Y142) – phospho-flow    | Alexa Fluor 647 | BD Biosciences  | 558489     |
| pERK71/2 (T202/Y204) - phospho-flow   | Alexa Fluor 647 | Cell Signaling  | 4375S      |

93

94 **Supplemental Table 3. List of gene sets used for GSEA**

|                                     |                                                                                                                                    |                                                                                                                                                                                                                                                                                                                                                                                                                                                                                                                                                                                                                                                                                                                                                                                                                                                                                                                                                                                                                                                                                                                                                                                                                                                                                                                                                                                                                                                                                                   |
|-------------------------------------|------------------------------------------------------------------------------------------------------------------------------------|---------------------------------------------------------------------------------------------------------------------------------------------------------------------------------------------------------------------------------------------------------------------------------------------------------------------------------------------------------------------------------------------------------------------------------------------------------------------------------------------------------------------------------------------------------------------------------------------------------------------------------------------------------------------------------------------------------------------------------------------------------------------------------------------------------------------------------------------------------------------------------------------------------------------------------------------------------------------------------------------------------------------------------------------------------------------------------------------------------------------------------------------------------------------------------------------------------------------------------------------------------------------------------------------------------------------------------------------------------------------------------------------------------------------------------------------------------------------------------------------------|
| SELF TOLERANT MOUSE CD8 (10)        | <a href="https://www.ncbi.nlm.nih.gov/pubmed/22267581">https://www.ncbi.nlm.nih.gov/pubmed/22267581</a><br>(CLUSTER 9 and 13)      | CD81, CLSPN, CDC20, KIF15, TCF19, LOC237877, LAG3, TNFRSF9, AURKA, BCAT1, TFRC, INCENP, MCM10, HMGN3, SNN, ESPL1, HIST1H3E, CHTF18, HIST1H2BN, TNFRSF9, KNTC1, GTSE1, SGOL1, ECM1, 3000004C01RIK, HIST1H3A, TFRC, KIF2C, CDCA2, FANCD2, 2410015N17RIK, CDC6, CHAF1A, CHST2, SPAG5, HIST1H2BM, CLDN10, IGF2BP3, NHEDC2, APITD1, CCDC99, LIG1, STMN1, ZRANB3, CDC45L, MARCKSL1, RGS16, PTPLA, CHST3, CENPM, HMGN3, CDC20, PTPRS, NCAPD2, NRG1, CENPM, HIST1H3C, SOX5, HIST1H3D, CKB, NRN1, HIST1H2BH, RCC1, BUB1B, HIST1H2BJ, HIST1H2AB, TPI1, MCM5, PTPRS, NMRAL1, RAD51, CDCA7, SPC25, NDRG1, KIF4, RILPL2, PIF1, CENPM, CENPA, RAD54L, HIST1H3H, 2610510J17RIK, HIST1H2BK, HIST1H2BF, E130016E03RIK, CDC7, ITM2A, FIBCD1, XCL1, SH3BP2, TOP2A, HIST1H2AF, PPIC, HIST1H2AN, CDC2A, BIRC5, HIST1H2AG, HIST2H2AB, PPIC, LITAF, E2F2, PRC1, CDCA3, H2AFX, BIRC5, HIST1H2AH, NUSAP1, PPA1, TYMS, LOC100047934, CCNB1, PSAT1, BIRC5, PBK, HIST1H2AK, MCM6, HIST1H2AD, TYMS-PS, TPI1, UHRF1, KLRB1C, ADK, RRM1, HIST1H2AO, E2F2, TNFRSF21, 2810417H13RIK, CCNB1, SCAMP1, CHN2, LMNB1, ANLN, RRM2, PKM2, KIF22, RRM2, PLK1, MAD2L1, LOC100045304, NCAPH, E2F1, HIST2H2AC, MCM6, TK1, FEN1, CLSPN, FIGNL1, D17H6S56E-5, NDRL, CDCA3, MCM2, KIF11, CDCA5, CDC20, CHAF1B, CAPG, 3000004C01RIK, MCM10, ENDOD1, CENPH, GALK1, SWAP70, LOC100047651, GFOD1                                                                                                                                                     |
| DELETIONAL TOLERANCE MOUSE CD8 (11) | <a href="https://www.ncbi.nlm.nih.gov/pubmed/19204323">https://www.ncbi.nlm.nih.gov/pubmed/19204323</a><br>(TABLE 1)               | TNFSF11, RGS16, NRN1, IKZF2, TBC1D4, GPM6B, ENDOD1, FCRL1, LRIG1, LRIG1, MARCKS, NR4A3, LTA, MARCKS, SYNJ2, NR4A1, HSPA4L, PTPRS, EGR2, PSCD3, YPEL2, EGR2, SKIL, NAB2, SOAT1, GALM, TOX, 4930539E08RIK, REEP3, MDH1, 4921525O09RIK, EPHX1, SSH1, CREM, PACSIN1, LPCAT1, PRMT2, CD200R1, NRIP1, DGKZ, RASA1, H3F3B, A830073O21RIK                                                                                                                                                                                                                                                                                                                                                                                                                                                                                                                                                                                                                                                                                                                                                                                                                                                                                                                                                                                                                                                                                                                                                                 |
| LAG3+ ANERGIC MOUSE CD4 (12)        | <a href="https://www.ncbi.nlm.nih.gov/pubmed/19666526">https://www.ncbi.nlm.nih.gov/pubmed/19666526</a><br>(from analysis by (13)) | 1500004A13RIK, 1700019D03RIK, 2210010C04RIK, 2310001H17RIK, 2700008G24RIK, 2900026A02RIK, 4930452B06RIK, 4930506M07RIK, 5330417C22RIK, 5430401H09RIK, 6330403K07RIK, 6720475J19RIK, 8030451A03RIK, 9630010G10RIK, ABCB10, ABHD4, ACVR1, ADCK3, ADRBK2, AGR3, AHSP, AKR1B8, ALAS2, ALCAM, ALDH1A1, ALDH1A7, ALOX5AP, ANGPTL2, ANXA3, APOE, APOL11B, APOL8, AQP1, ARL6, ART3, ASCL2, ASNS, ATCAY, ATP2B2, ATRX, AURKB, B930095G15RIK, BC013712, BCL6, BLVRB, BMP2, BMPR2, BRCA1, BZRAP1, C2CD4B, C3, C730029A08RIK, CACNA1D, CAMK2N1, CAMP, CAPN5, CAR1, CAR2, CAR5B, CASC5, CASP3, CAV2, CC2D2A, CCDC112, CCDC28B, CCDC80, CCL1, CCL3, CCL6, CCL9, CCNB1, CCNE2, CCR8, CD109, CD200, CD24A, CD300LB, CD36, CD38, CD68, CD83, CD99L2, CDC6, CDCA8, CDKN2B, CEBPA, CEL, CELA1, CELA2A, CELA3B, CENPE, CENPK, CETN4, CHI3L3, CHN1, CHST2, CHTF18, CIT, CLDN13, CLEC4A3, CLEC4G, CLEC7A, CLIP3, CLPS, CLU, CNRIP1, COBLL1, COCH, COL4A1, COL4A2, CORO2B, CPA1, CPA2, CPB1, CREB3L2, CSDA, CSF1, CSF1R, CSF2RB, CSGALNACT1, CST7, CTGF, CTRB1, CTRL, CTSB, CTSH, CTTN, CX3CR1, CXCL10, CXCR7, CXXC5, CYBB, CYFIP1, CYP1A1, D10BWWG1379E, D17H6S56E-5, D430019H16RIK, D630039A03RIK, DXERTD242E, DDC, DDX3Y, DGKI, DMBT1, DMXL2, DNAHC7B, DNASE1L3, DOCK4, DOCK7, DRAM1, DSP, DUSP14, DUSP16, DUSP4, DYNLT3, E130308A19RIK, EAR2, ECE1, EDN3, EEA1, EFN2, EGR2, EIF2S3Y, EMILIN2, EMR4, ENPP2, ENTPD1, EOMES, EPB4.2, EPDR1, ERMAP, EVI5, EXPH5, F13A1, FAM132A, FAM20A, FAM43A, FAM55B, FAM55D, FAM59A, |

|  |  |                                                                                                                                                                                                                                                                                                                                                                                                                                                                                                                                                                                                                                                                                                                                                                                                                                                                                                                                                                                                                                                                                                                                                                                                                                                                                                                                                                                                                                                                                                                                                                                                                                                                                                                                                                                                                                                                                                                                                                                                                                                                                                                                                                              |
|--|--|------------------------------------------------------------------------------------------------------------------------------------------------------------------------------------------------------------------------------------------------------------------------------------------------------------------------------------------------------------------------------------------------------------------------------------------------------------------------------------------------------------------------------------------------------------------------------------------------------------------------------------------------------------------------------------------------------------------------------------------------------------------------------------------------------------------------------------------------------------------------------------------------------------------------------------------------------------------------------------------------------------------------------------------------------------------------------------------------------------------------------------------------------------------------------------------------------------------------------------------------------------------------------------------------------------------------------------------------------------------------------------------------------------------------------------------------------------------------------------------------------------------------------------------------------------------------------------------------------------------------------------------------------------------------------------------------------------------------------------------------------------------------------------------------------------------------------------------------------------------------------------------------------------------------------------------------------------------------------------------------------------------------------------------------------------------------------------------------------------------------------------------------------------------------------|
|  |  | <p>FAM81A, FAM84A, FARP1, FARP2, FBN2, FGD6, FHDC1, FIGNL1, FLRT2, FMNL2, FNDC3B, FPR2, FRMD4A, FZD6, GABARAPL1, GALM, GAS2L1, GATM, GCG, GDA, GJA1, GJB2, GLT28D2, GNA14, GNAQ, GP2, GPM6B, GPR116, GPR160, GPR35, GSTM1, GSTM5, GSTT3, GUCY1A3, GYPA, H2-AA, HAVCR2, HBB-B2, HCK, HEBP1, HEMGN, HIF1A, HIP1, HIVEP3, HJURP, HMBS, HMG3, HP, ID2, IER5L, IFITM2, IFITM3, IFT122, IGDCC4, IGF1R, IGHM, IGHV14-2, IGSF6, IKZF2, IL10, IL1R2, IL21, ISPD, ITGB5, ITGB8, JAZF1, KDELC2, KDM5D, KEL, KIF13A, KIRREL3, KLF1, KLK1, KLRB1A, LAG3, LCN2, LIFR, LIMA1, LITAF, LMO2, LPAR3, LPL, LTF, LYN, LYZ1, LYZ2, MAF, MAGI3, MALT1, MAPRE2, 41341, MARCKSL1, MATN2, MET, MFSD2B, MGST1, MMD, MMP14, MPEG1, MPO, MT1, MTAP2, MTMR7, MYH10, MYH3, MYO1E, NA, NANOS1, NCAPG, NCRNA00086, NDN, NDRG4, NF2, NFATC1, NFE2, NFIL3, NGP, NHEDC2, NPAS4, NPNT, NR4A2, NRBP2, NRN1, NRP1, NT5E, NTF5, NTRK3, NUDT6, OCLN, ORC1, PADI4, PBK, PBX3, PDCD1, PDGFRL, PDZK1IP1, PDZRN3, PENK, PERP, PEX11A, PHACTR2, PISD-PS3, PKD2, PLAGL1, PLEK, PLEKHO1, PLOD2, PLSCR4, PLXDC2, PLXNB2, PNLIP, PNLIPRP1, PNLIPRP2, PPAP2A, PRELID2, PRKAR2B, PRKCA, PRNP, PRPF40A, PRSS2, PTGER2, PTGFRN, PTPLA, PTPN11, PTPN13, PTPN5, PTPRB, PTPRJ, PTPRS, PYGL, RAB39B, RALYL, RAPGEF5, RASSF6, RBM5, RBPJ, RCAN1, REEP1, REG1, RGS16, RHAG, RHD, RNASE1, RNF128, RPS6KC1, S100A10, S100A8, S100A9, S1PR3, SAMD11, SCCPDH, SCIN, SCLY, SDPR, SDR39U1, SEC16B, SEMA4C, SEMA7A, SERPINA9, SERPINC1, SERPINF1, SH3GL3, SH3RF1, SIRPB1A, SLC1A4, SLC22A15, SLC24A3, SLC25A13, SLC29A1, SLC35F5, SLC37A2, SLC38A5, SLC4A1, SLC5A3, SLC6A8, SLC7A10, SMC2, SMPDL3B, SNCA, SOSTDC1, SOX6, SPAG5, SPARC, SPIN4, SPIRE1, SPNA1, SPOCK2, SPP1, SRGAP3, SRXN1, STAB2, STC2, STFA3, STOM, STX11, SUSD2, SYNPO, SYT11, TAL1, TBC1D4, TCEAL8, TEX15, TFPI, TFRC, TG, TGFBI, TGM2, TIAM2, TIMP2, TJP1, TJP2, TM4SF1, TMBIM1, TMCC2, TMCC3, TMEM2, TMEM26, TMEM56, TMPRSS11E, TNFAIP2, TNFAIP8, TNFRSF9, TNFSF8, TNFSF9, TOX, TPMT, TREML4, TRFR2, TRIM10, TRIM12A, TRPS1, TSC1, TSHZ2, TSPAN2, TSPAN33, TSPAN8, TWSG1, UBR2, UHRF1, UNC13B, UTY, VAT1L, VDR, VSIG10, WIPF3, WISP1, ZBTB32, ZEB2, ZER1, ZFP612, ZG16</p> |
|--|--|------------------------------------------------------------------------------------------------------------------------------------------------------------------------------------------------------------------------------------------------------------------------------------------------------------------------------------------------------------------------------------------------------------------------------------------------------------------------------------------------------------------------------------------------------------------------------------------------------------------------------------------------------------------------------------------------------------------------------------------------------------------------------------------------------------------------------------------------------------------------------------------------------------------------------------------------------------------------------------------------------------------------------------------------------------------------------------------------------------------------------------------------------------------------------------------------------------------------------------------------------------------------------------------------------------------------------------------------------------------------------------------------------------------------------------------------------------------------------------------------------------------------------------------------------------------------------------------------------------------------------------------------------------------------------------------------------------------------------------------------------------------------------------------------------------------------------------------------------------------------------------------------------------------------------------------------------------------------------------------------------------------------------------------------------------------------------------------------------------------------------------------------------------------------------|

96 **SUPPLEMENTAL FIGURE LEGENDS**

97 **Supplemental Figure 1. Characterization and baseline expression of TCR/CD3 complex**  
98 **in *de novo* HLA-A2-expressing Jurkat J76 CD8 $\alpha$  $\beta$  T cells. (A)** Representative histograms of  
99 surface markers on the parental Jurkat J76 CD8 $\alpha$  $\beta$  cell line. Gray histograms correspond to  
100 unstained cells and colored histograms to cells stained with the indicated antibodies. **(B)**  
101 Representative histograms of HLA-A2 and HLA-A3 expression on codon-optimized A2-  
102 transduced J76 CD8 $\alpha$  $\beta$  cells (A2<sup>pos</sup>/A3<sup>pos</sup>), parental J76 CD8 $\alpha$  $\beta$  cells (A2<sup>neg</sup>/A3<sup>pos</sup>), T2 cells  
103 (A2<sup>pos</sup>/A3<sup>neg</sup>), and C1R cells (A2<sup>neg</sup>/A3<sup>pos</sup>). **(C)** Killing assays with NY-ESO-1-specific A2<sup>neg</sup>  
104 CD8 T cells (DM $\beta$  TCR variant) as effectors and indicated cells as targets, in the presence of  
105 increased concentrations of NY-ESO-1<sub>157-165</sub> native peptide. **(D)** Representative histograms of  
106 expression levels of the TCR/CD3 complex (panTCR $\alpha$  $\beta$ , V $\beta$ 13.1 and CD3 $\epsilon$ ) under steady-state  
107 culture conditions, in absence of antigen-specific stimulation. **(E)** Quantification of the  
108 expression of surface (i.e. extracellular) CD3 $\epsilon$  and of total (i.e. intra- and extracellular) CD3 $\epsilon$ .  
109 **(C and E)** Data are representative of 2 to 3 independent experiments.

110

111 **Supplemental Figure 2. Phosphorylation levels of CD3 $\zeta$  and ERK upon stimulation and**  
112 **basal expression levels of surface receptors in A2<sup>pos</sup> and A2<sup>neg</sup> J76 CD8 $\alpha$  $\beta$  T cells. (A)**  
113 Representative histograms of phosphorylation levels of CD3 $\zeta$  and ERK1/2 after stimulation  
114 (with NY-ESO-1 multimer, OKT-3 or PMA/ionomycin) in A2<sup>pos</sup> (red histograms) and A2<sup>neg</sup>  
115 (blue histograms) J76 CD8 $\alpha$  $\beta$  cells. **(B, C)** Representative histograms of CD5 and c-CBL  
116 expression **(B)** and of PD-1 and CD69 expression **(C)** in A2<sup>pos</sup> (red histograms) versus A2<sup>neg</sup>  
117 (blue histograms) J76 CD8 $\alpha$  $\beta$  cells, under resting conditions.

118

119 **Supplemental Figure 3. Basal expression levels of co-activating/inhibitory receptors on**  
120 **A2<sup>pos</sup> and A2<sup>neg</sup> primary CD8 T cells upon affinity-increased TCR transduction. (A)**  
121 Representative histograms of the expression levels of co-activating/inhibitory receptors on  
122 A2<sup>pos</sup> (CRISPR/GFP) and A2<sup>neg</sup> (CRISPR/A2) primary CD8 T cells post-TCR transduction, in  
123 the absence of cognate antigen. Of note, no difference in any surface marker was observed  
124 between A2<sup>pos</sup> and A2<sup>neg</sup> untransduced CD8 T cells (gray histograms). **(B)** Relative expansion  
125 of A2<sup>pos</sup> (red lines) versus A2<sup>neg</sup> (blue lines) tumor-specific CD8 T cells upon TCR transduction,  
126 represented as NY-ESO-1<sup>pos</sup> T cell fraction (upper panels) or as NY-ESO-1<sup>pos</sup> variations from  
127 the initial transduction efficiency (bottom panels). Data are representative of 5 to 10  
128 experiments.



129 **Supplemental Figure 4. Surface staining and population doublings of primary A2<sup>pos</sup> CD8**  
130 **T cells with or without PD-1 blocking antibody. (A)** Representative histograms of expression  
131 levels of co-activating/inhibitory receptors in A2<sup>pos</sup> (CRISPR/A2) CD8 T cells post-TCR  
132 transduction, cultured over time with or without 20 µg/mL of nivolumab. **(B)** Population  
133 doublings of TCR-transduced A2<sup>pos</sup> (CRISPR/A2) CD8 T cells cultured in the presence or the  
134 absence of 20 µg/mL nivolumab were assessed by periodic cell counting of living cells during  
135 10 days and in the absence of cognate antigen. Data are representative of two independent  
136 experiments.

137

138 **Supplemental Figure 5. Gene Set Enrichment Analysis (GSEA) of high-affinity versus**  
139 **optimal TCR variants.** Genome-wide microarray analysis was previously performed on A2<sup>pos</sup>  
140 primary CD8 T cells engineered with our panel of TCR variants against NY-ESO-1 (GSE42922)  
141 (2). **(A, B)** GSEA of available gene sets describing anergy (12), self-tolerance (10), and  
142 deletional tolerance (11) were found enriched in A2<sup>pos</sup> CD8 T cells expressing **(A)** the high-  
143 affinity TCR wtc51m variant versus the wild-type one and **(B)** the high-affinity (i.e. TMα and  
144 wtc51m) relative to optimal-affinity TCR variants (i.e. G50A and DMβ), under steady-state  
145 culture conditions. Nominal p values and false discovery rates (FDR) are indicated for each  
146 gene set enrichment.

147

148 **Supplemental Figure 6. CD107a degranulation and killing capacity of A2<sup>pos</sup> and A2<sup>neg</sup>**  
149 **primary CD8 T cells expressing affinity-increased TCRs. (A)** Baseline expression levels of  
150 granzyme B and perforin in A2<sup>pos</sup> and A2<sup>neg</sup> primary CD8 T cells. **(B)** CD107a degranulation  
151 of A2<sup>pos</sup> and A2<sup>neg</sup> primary CD8 T cells upon stimulation with native NY-ESO-1 peptide-pulsed  
152 T2 cells at 0.1 µM. **(C)** Representative graphs (left panel) and quantification (right panel) of  
153 killing of Me275 cells pulsed with 1 µM of NY-ESO-1<sub>157-165</sub> native peptide at the indicated E:T  
154 ratios. **(D)** Representative graphs (left panel) and quantification of EC50 values (right panel)  
155 of killing of T2 cells pulsed with different concentrations of NY-ESO-1<sub>157-165</sub> native peptide  
156 (pp), at an E:T ratio of 10:1 by chromium release assays. **(A-D)** Data are means ± SD of 4-6  
157 independent experiments.

158

159 **Supplemental Figure 7. Expression levels of PD-1 and CD69 in A2<sup>neg</sup> J76 CD8αβ cells**  
160 **during 14 days of co-culture with NA8 tumor cells. (A)** Schematic representation of the  
161 experimental design; A2<sup>neg</sup> J76 CD8αβ T cells of increased-affinity TCRs were co-cultured  
162 with either A2<sup>pos</sup> or A2<sup>neg</sup> NA8 tumor cells for 14 days in the absence of cognate antigen. **(B)**

163 Expression levels of PD-1 and CD69 on A2<sup>neg</sup> J76 CD8 $\alpha\beta$  cells were performed at day 2, 4, 7,  
164 10 and 14 of co-culture with either A2<sup>pos</sup> or A2<sup>neg</sup> NA8 tumor cells. Data are means  $\pm$  SD of  
165 two independent co-culture experiments (n = 10). Matched P values are by two-way ANOVA  
166 followed by Sidak's multiple comparisons test; \* P  $\leq$  0.05 and \*\*\*\* P  $\leq$  0.0001.

167

168 **Supplemental Figure 8. Dynamics of A2<sup>pos</sup> versus A2<sup>neg</sup> redirected primary CD8 T cell**  
169 **sub-populations in co-cultures following TCR transduction. (A)** Schematic representation  
170 of the A2<sup>pos</sup> (CRISPR/mock) and A2<sup>neg</sup> (CRISPR/A2) CD8 T cell co-cultures at an initial ratio  
171 of 1:1. TCR-untransduced CD8 T cells are depicted as gray-filled circles. **(B)** Flow cytometry  
172 gating (left panels) and quantification of A2<sup>pos</sup> and A2<sup>neg</sup> sub-populations (right panels) at the  
173 indicated days following TCR transduction and according to the different TCR affinity variants.

174 **REFERENCES**

- 175 1. Ran FA, Hsu PD, Wright J, Agarwala V, Scott DA, and Zhang F. Genome engineering  
176 using the CRISPR-Cas9 system. *Nat Protoc.* 2013;8(11):2281-308.
- 177 2. Hebeisen M, Baitsch L, Presotto D, Baumgaertner P, Romero P, Michielin O, et al. SHP-  
178 1 phosphatase activity counteracts increased T cell receptor affinity. *J Clin Invest.*  
179 2013;123(3):1044-56.
- 180 3. Irving M, Zoete V, Hebeisen M, Schmid D, Baumgaertner P, Guillaume P, et al. Interplay  
181 between T cell receptor binding kinetics and the level of cognate peptide presented by  
182 major histocompatibility complexes governs CD8+ T cell responsiveness. *J Biol Chem.*  
183 2012;287(27):23068-78.
- 184 4. Allard M, Couturaud B, Carretero-Iglesia L, Duong MN, Schmidt J, Monnot GC, et al.  
185 TCR-ligand dissociation rate is a robust and stable biomarker of CD8+ T cell potency.  
186 *JCI Insight.* 2017;2(14).
- 187 5. Derre L, Bruyninx M, Baumgaertner P, Ferber M, Schmid D, Leimgruber A, et al.  
188 Distinct sets of alphabeta TCRs confer similar recognition of tumor antigen NY-ESO-  
189 1157-165 by interacting with its central Met/Trp residues. *Proc Natl Acad Sci U S A.*  
190 2008;105(39):15010-5.
- 191 6. Chen JL, Stewart-Jones G, Bossi G, Lissin NM, Wooldridge L, Choi EM, et al. Structural  
192 and kinetic basis for heightened immunogenicity of T cell vaccines. *J Exp Med.*  
193 2005;201(8):1243-55.
- 194 7. Dunn SM, Rizkallah PJ, Baston E, Mahon T, Cameron B, Moysey R, et al. Directed  
195 evolution of human T cell receptor CDR2 residues by phage display dramatically  
196 enhances affinity for cognate peptide-MHC without increasing apparent cross-reactivity.  
197 *Protein Sci.* 2006;15(4):710-21.
- 198 8. Robbins PF, Li YF, El-Gamil M, Zhao Y, Wargo JA, Zheng Z, et al. Single and dual  
199 amino acid substitutions in TCR CDRs can enhance antigen-specific T cell functions. *J*  
200 *Immunol.* 2008;180(9):6116-31.
- 201 9. Hebeisen M, Schmidt J, Guillaume P, Baumgaertner P, Speiser DE, Luescher I, et al.  
202 Identification of Rare High-Avidity, Tumor-Reactive CD8+ T Cells by Monomeric TCR-  
203 Ligand Off-Rates Measurements on Living Cells. *Cancer Res.* 2015;75(10):1983-91.
- 204 10. Schietinger A, Delrow JJ, Basom RS, Blattman JN, and Greenberg PD. Rescued tolerant  
205 CD8 T cells are preprogrammed to reestablish the tolerant state. *Science.*  
206 2012;335(6069):723-7.
- 207 11. Parish IA, Rao S, Smyth GK, Juelich T, Denyer GS, Davey GM, et al. The molecular  
208 signature of CD8+ T cells undergoing deletional tolerance. *Blood.* 2009;113(19):4575-  
209 85.
- 210 12. Okamura T, Fujio K, Shibuya M, Sumitomo S, Shoda H, Sakaguchi S, et al. CD4+CD25-  
211 LAG3+ regulatory T cells controlled by the transcription factor Egr-2. *Proc Natl Acad*  
212 *Sci U S A.* 2009;106(33):13974-9.
- 213 13. Martinez GJ, Pereira RM, Aijo T, Kim EY, Marangoni F, Pipkin ME, et al. The  
214 transcription factor NFAT promotes exhaustion of activated CD8(+) T cells. *Immunity.*  
215 2015;42(2):265-78.
- 216

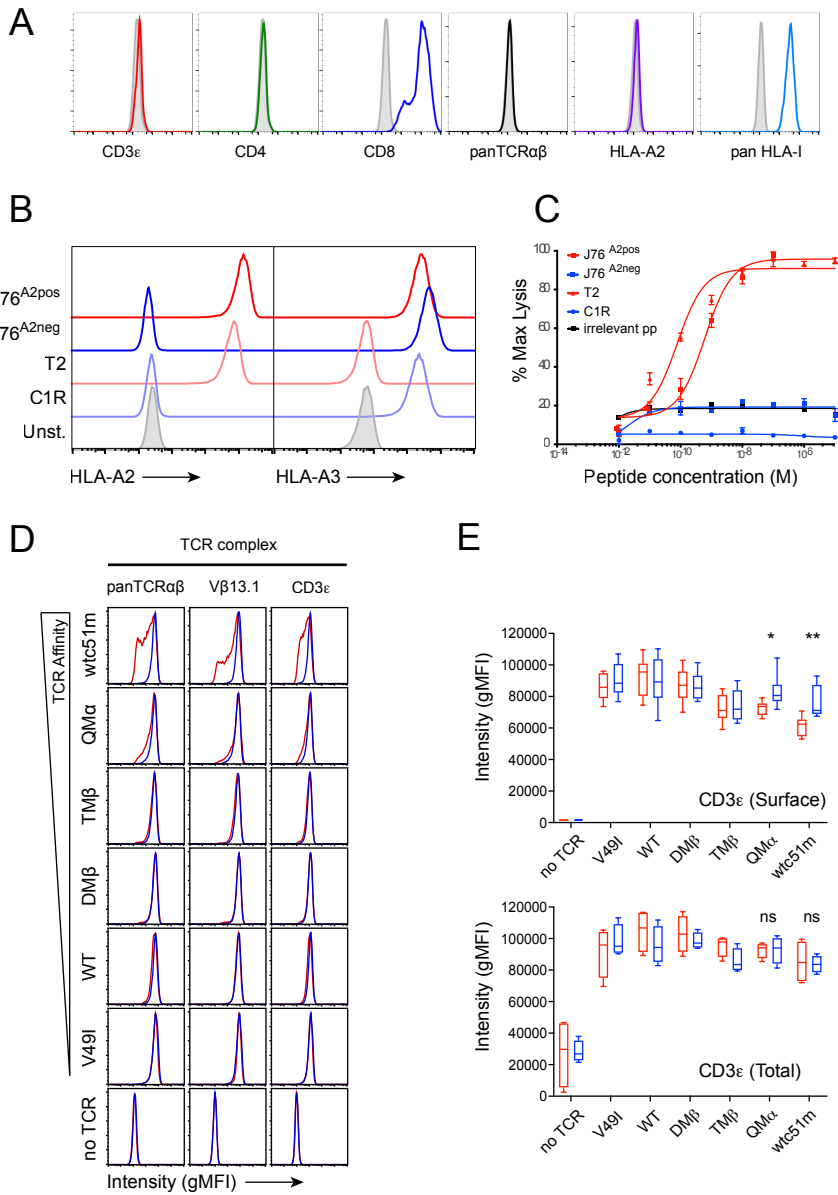

Supplementary FIGURE 1 - Duong et al.

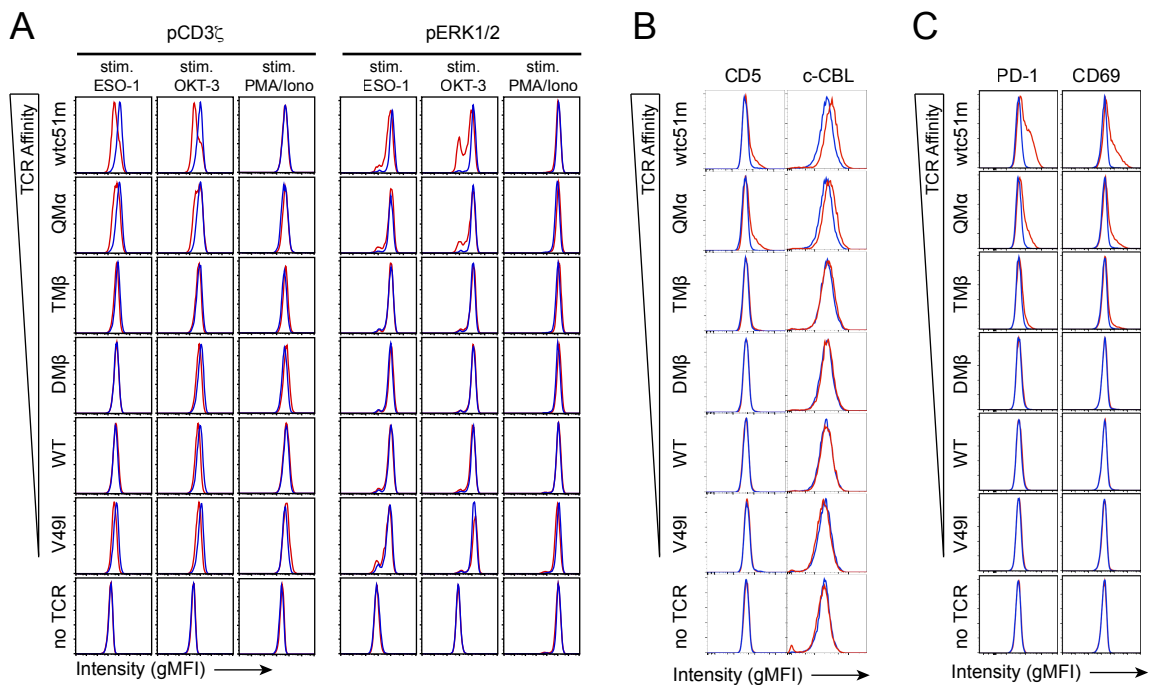

Supplementary FIGURE 2 - Duong et al.

**A**

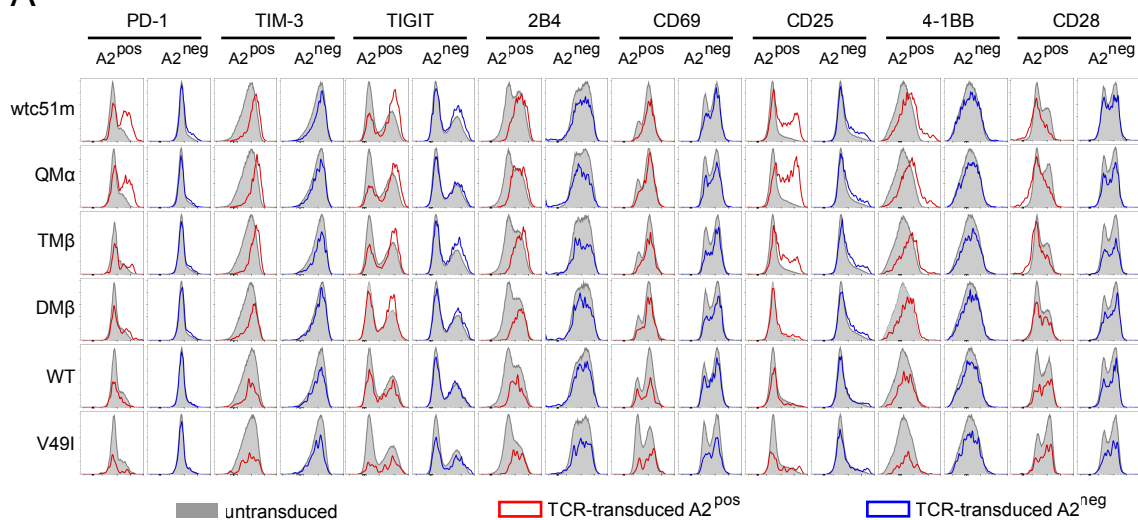

**B**

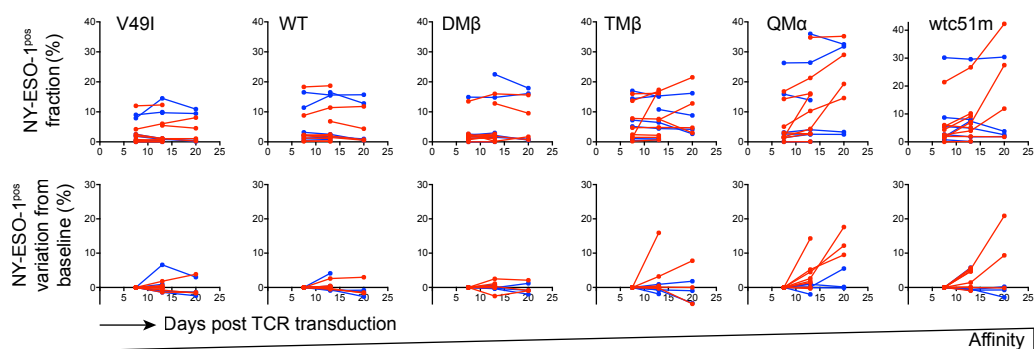

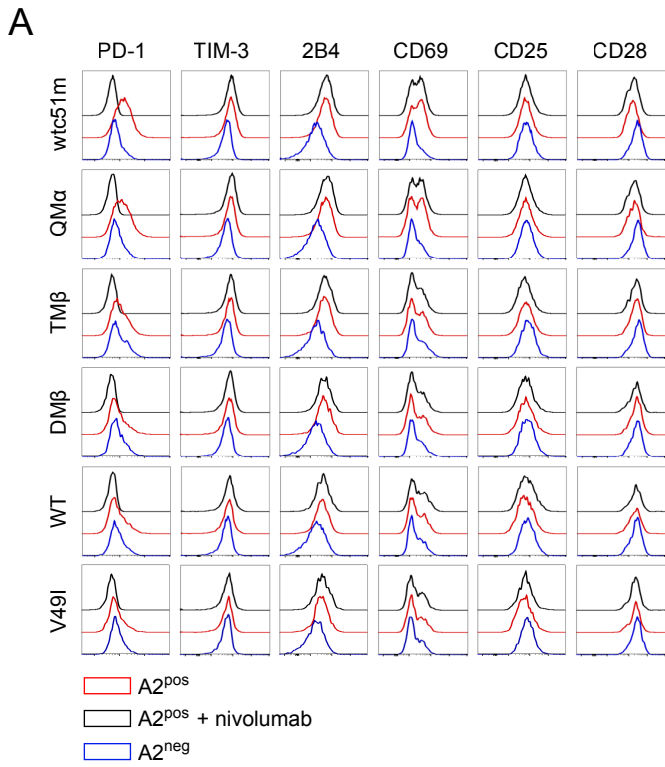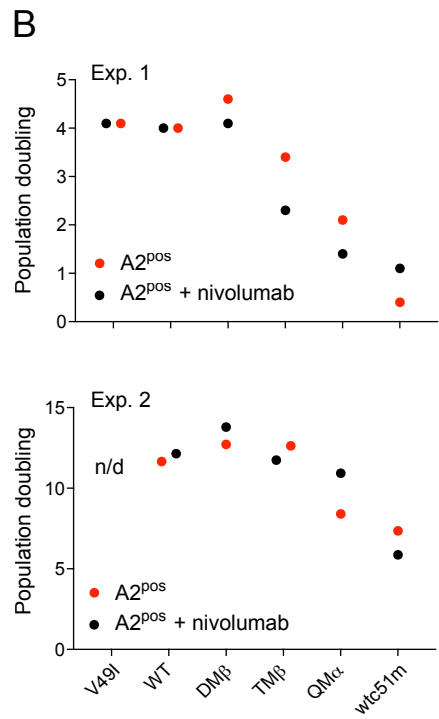

### Gene set enrichment analyses (GSEA) at baseline

#### A wtc51m vs. wild-type

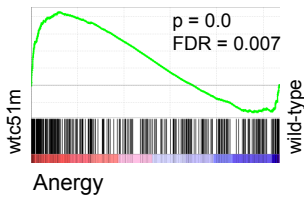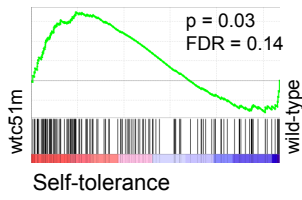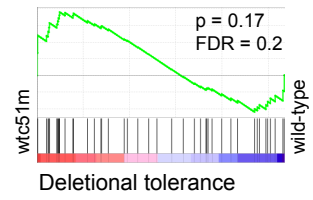

#### B high vs. optimal TCR affinity variants

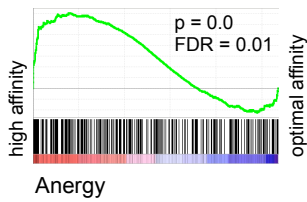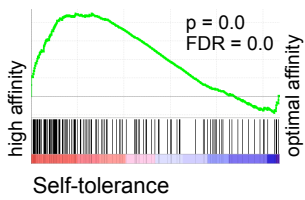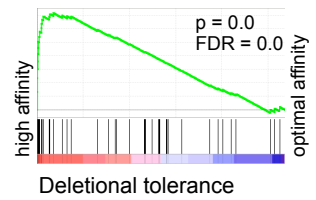



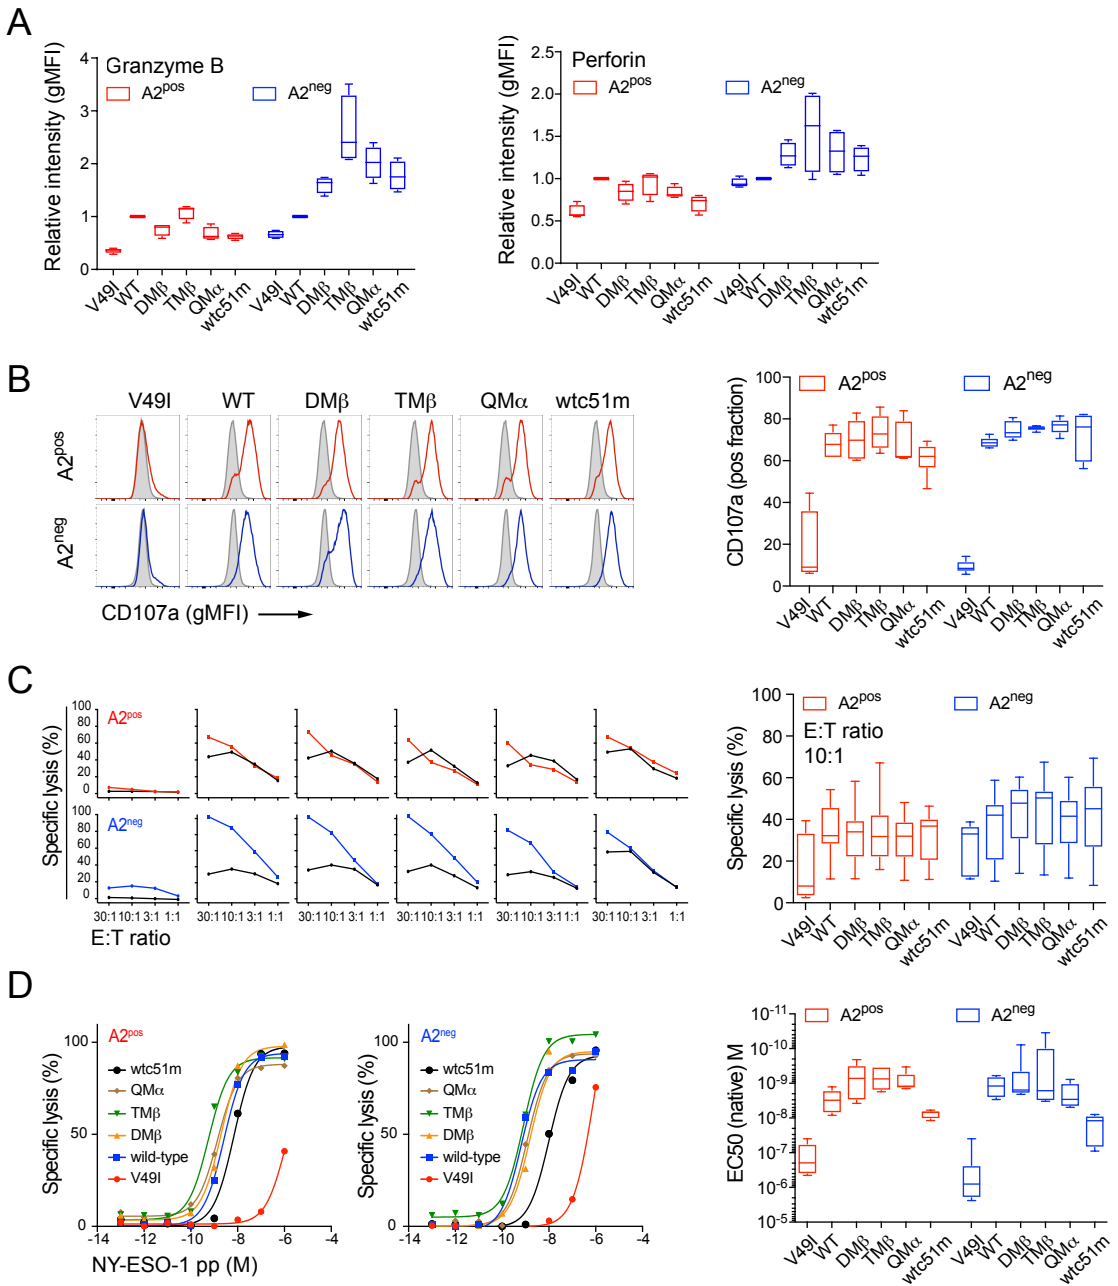

Supplementary FIGURE 6 - Duong et al.

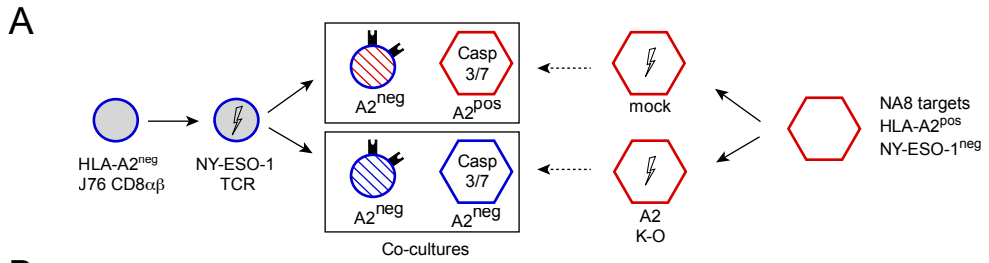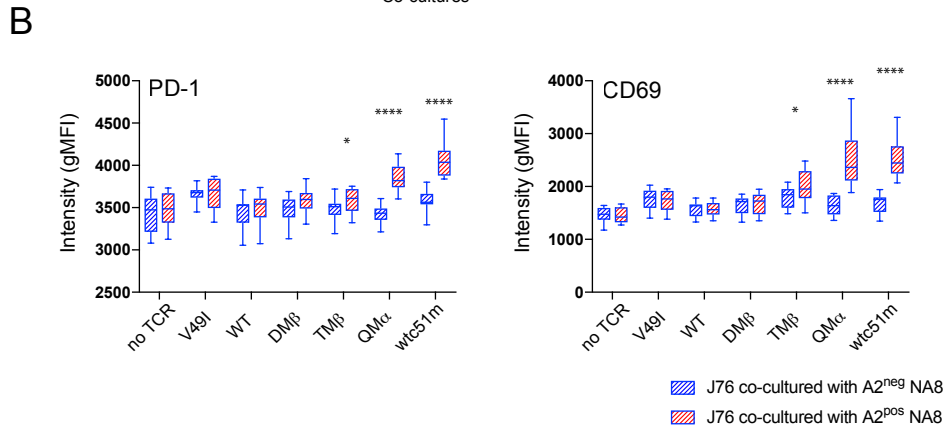

**A**

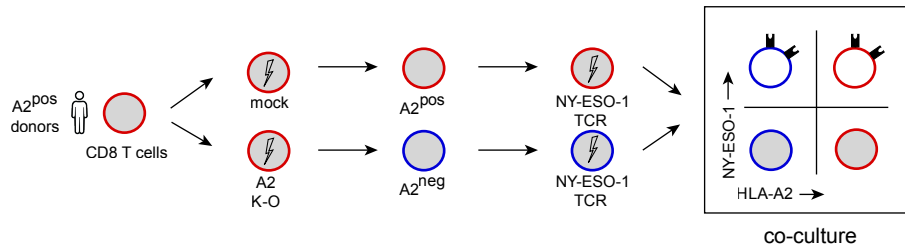

**B**

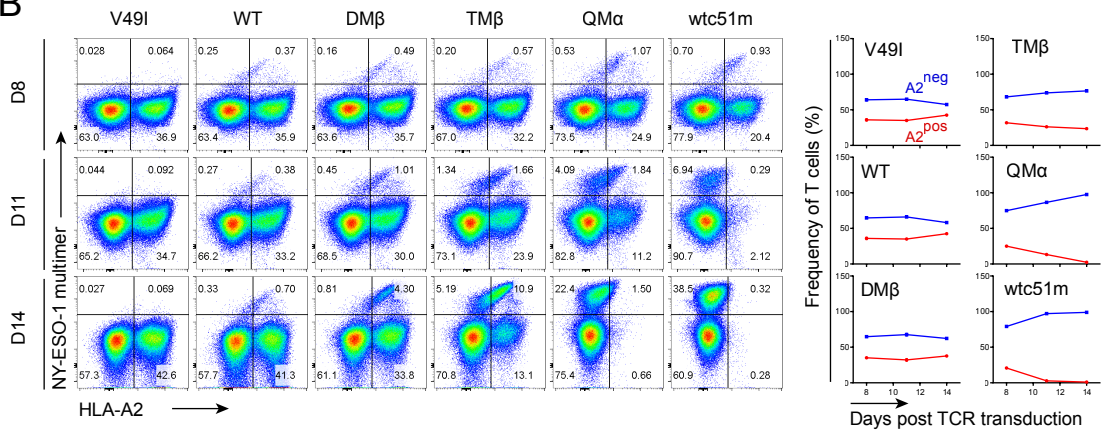

Supplement: media-1 [file media-1.pdf]
